# Supplementary material for: Management of Acute Cholecystitis in High-Risk Patients: Percutaneous Gallbladder Drainage as a Definitive Treatment vs. Emergency Cholecystectomy. Systematic Review and Meta-Analysis
Source: Preprints.org preprint supplement (doi:10.20944/preprints202307.0094.v1), 2023-07-04
Supplement: Supplementary file 3 [file Fig. 5.docx]

| **Summary of findings:** | | | | | | |
| --- | --- | --- | --- | --- | --- | --- |
| **PTGBD compared to EC** | | | | | | |
| **Patient or population:** Acute cholecystitis  **Setting:** Emergency admission  **Intervention:** PTGBD  **Comparison:** EC | | | | | | |
| Outcomes | **Anticipated absolute effects*** (95% CI) | | Relative effect (95% CI) | № of participants (studies) | Certainty of the evidence (GRADE) | Comments |
| **Risk with placebo** | **Risk with Post-operative** |
| Post-operative 30-day mortality | 24 per 1.000 | **100 per 1.000** (64 to 156) | **RR 4.21** (2.69 to 6.58) | 776706 (16 studies) | ⨁⨁◯◯ Low | PTGBD could be used in critical ill conditions patients for whom surgery is at very high risk (recommendation "positive weak") |
| Overall post-operative complications | 91 per 1.000 | **70 per 1.000** (40 to 121) | **RR 0.77** (0.44 to 1.34) | 746810 (11 studies) | ⨁⨁◯◯ Low | PTGBD could be used in critical ill conditions patients for whom surgery is at very high risk (recommendation "positive weak") |
| Intra-abdominal abscess | 15 per 1.000 | **11 per 1.000** (1 to 84) | **RR 0.70** (0.09 to 5.52) | 238 (2 studies) | ⨁⨁◯◯ Low | PTGBD could be used in critical ill conditions patients for whom surgery is at very high risk (recommendation "positive weak") |
| Emergency re-intervention | 29 per 1.000 | **110 per 1.000** (27 to 450) | **RR 3.75** (0.92 to 15.33) | 630 (5 studies) | ⨁⨁◯◯ Low | PTGBD could be used in critical ill conditions patients for whom surgery is at very high risk (recommendation "positive weak") |
| ***The risk in the intervention group** (and its 95% confidence interval) is based on the assumed risk in the comparison group and the **relative effect** of the intervention (and its 95% CI).  **CI:** confidence interval; **RR:** risk ratio | | | | | | |  |  |  |  |  |  |
| **GRADE Working Group grades of evidence** **High certainty:** we are very confident that the true effect lies close to that of the estimate of the effect. **Moderate certainty:** we are moderately confident in the effect estimate: the true effect is likely to be close to the estimate of the effect, but there is a possibility that it is substantially different. **Low certainty:** our confidence in the effect estimate is limited: the true effect may be substantially different from the estimate of the effect. **Very low certainty:** we have very little confidence in the effect estimate: the true effect is likely to be substantially different from the estimate of effect. | | | | | | |
