# Supplementary material for: Management of Acute Cholecystitis in High-Risk Patients: Percutaneous Gallbladder Drainage as a Definitive Treatment vs. Emergency Cholecystectomy. Systematic Review and Meta-Analysis
Source: Preprints.org preprint supplement (doi:10.20944/preprints202307.0094.v1), 2023-07-04
Supplement: Supplementary file 4 [file SDC Fig 1.docx]

Supplementary Figure 1. Prisma flow chart of literature search

Additional records identified through other sources (n= 17)

Records identified through database searching (n= 536)

Records after duplicates removed (n = 459)

Records excluded
(n = 428)

Records screened
(n = 459)

Full-text articles assessed for eligibility (n = 31)

Full-text articles excluded (n = 14)

Studies included in qualitative synthesis (n = 17)

Studies included in quantitative synthesis (meta-analysis)
(n = 17)
