# Supplementary material for: Management of Acute Cholecystitis in High-Risk Patients: Percutaneous Gallbladder Drainage as a Definitive Treatment vs. Emergency Cholecystectomy. Systematic Review and Meta-Analysis
Source: Preprints.org preprint supplement (doi:10.20944/preprints202307.0094.v1), 2023-07-04

Supplementary Fig. 2. Risk-of-bias summary: review authors' judgments about each risk-of-bias item for included studies.


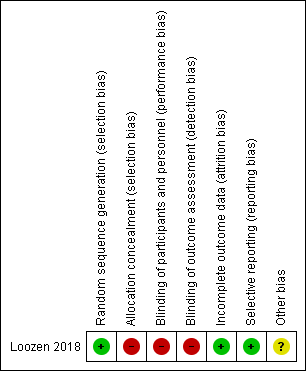

Supplement: Supplementary file 5 [file SDC Fig 2.docx]
