# Supplementary material for: Management of Acute Cholecystitis in High-Risk Patients: Percutaneous Gallbladder Drainage as a Definitive Treatment vs. Emergency Cholecystectomy. Systematic Review and Meta-Analysis
Source: Preprints.org preprint supplement (doi:10.20944/preprints202307.0094.v1), 2023-07-04
Supplement: Supplementary file 11 [file SDC Tab 2.docx]

**Supplementary Table 2.** Diagnostic parameters in included studies

| **Author –**  **year** | | **Physical**  **examination** | **Laboratory**  **findings** | | **Ultrasonographic abnormalities** | | | |
| --- | --- | --- | --- | --- | --- | --- | --- | --- |
| **Tenderness** | **Elevated leukocyte** | **C-reactive protein levels** | **Gallstones, sludge** | | **Wall thickening ≥ 3 mm, pericholecystic fluid** | **Murphy’s sign** |
| Latif et al  2022 | **PTGBD group** | Yes | Yes | Yes | Yes | | Yes | Yes |
| **LC in control group** | Yes | Yes | Yes | Yes | | Yes | Yes |
| **OC in control group** | Yes | Yes | Yes | Yes | | Yes | Yes |
| Somuncu  et al 2021 | **PTGBD group** | NR | NR | NR | NR | | Yes | NR |
| **LC in control group** | NR | NR | NR | NR | | Yes | NR |
| **OC in control group** | Yes | Yes | Yes | NR | | Yes | NR |
| Garcés Albir  et al 2020 | **PTGBD group** | NR | NR | NR | NR | | NR | NR |
| **LC in control group** | NR | NR | NR | NR | | NR | NR |
| **OC in control group** | NR | NR | NR | NR | | NR | NR |
| El Hadidi  et al 2019 | **PTGBD group** | Yes | Yes | Yes | Yes | | Yes | Yes |
| **LC in control group** | Yes | Yes | Yes | Yes | | Yes | Yes |
| **OC in control group** | Yes | Yes | Yes | Yes | | Yes | Yes |
| Fleming  et al 2019 | **PTGBD group** | NR | NR | NR | NR | | NR | NR |
| **LC in control group** | NR | NR | NR | NR | | NR | NR |
| **OC in control group** | NR | NR | NR | NR | | NR | NR |
| Loozen  et al 2018 | **PTGBD group** | Yes | Yes | Yes | Yes | | Yes | Yes |
| **LC in control group** | Yes | Yes | Yes | Yes | | Yes | Yes |
| Schlottmann  et al 2018 | **PTGBD group** | NR | NR | NR | NR | | NR | NR |
| **LC in control group** | NR | NR | NR | NR | | NR | NR |
| **OC in control group** | NR | NR | NR | NR | | NR | NR |
| La Greca  et al 2017 | **PTGBD group** | Yes | Yes | Yes | Yes | | Yes | Yes |
| **LC in control group** | Yes | Yes | Yes | Yes | | Yes | Yes |
| **OC in control group** | Yes | Yes | Yes | Yes | | Yes | Yes |
| Lu et al.  2017 | **PTGBD group** | NR | NR | NR | NR | NR | | NR |
| **LC in control group** | NR | NR | NR | NR | NR | | NR |
| **OC in control group** | NR | NR | NR | NR | NR | | NR |
| Anderson  et al 2014 | **PTGBD group** | NR | NR | NR | NR | NR | | NR |
| **LC in control group** | NR | NR | NR | NR | NR | | NR |
| **OC in control group** | NR | NR | NR | NR | NR | | NR |
| Zehetner  et al 2014 | **PTGBD group** | Yes | Yes | NR | Yes | Yes | | NR |
| **LC in control group** | Yes | Yes | NR | Yes | Yes | | NR |
| **OC in control group** | Yes | Yes | NR | Yes | Yes | | NR |
| Anderson  et al 2013 | **PTGBD group** | NR | NR | NR | NR | NR | | NR |
| **LC in control group** | NR | NR | NR | NR | NR | | NR |
| **OC in control group** | NR | NR | NR | NR | NR | | NR |
| Simorov  et al 2013 | **PTGBD group** | NR | NR | NR | NR | | NR | NR |
| **LC in control group** | NR | NR | NR | NR | | NR | NR |
| **OC in control group** | NR | NR | NR | NR | | NR | NR |
| Smith | **PTGBD group** | NR | NR | NR | NR | | NR | NR |
| **LC in control group** | NR | NR | NR | NR | | NR | NR |
| **LC in control group** | NR | NR | NR | NR | | NR | NR |
| Abi-Haidar  et al 2012 | **PTGBD group** | Yes | Yes | Yes | Yes | | Yes | Yes |
| **LC in control group** | Yes | Yes | Yes | Yes | | Yes | Yes |
| **OC in control group** | Yes | Yes | Yes | Yes | | Yes | Yes |
| Rodrìguez-Sanjuàn  et al 2012 | **PTGBD group** | Yes | Yes | Yes | Yes | | Yes | Yes |
| **LC in control group** | Yes | Yes | Yes | Yes | | Yes | Yes |
| **OC in control group** | Yes | Yes | Yes | Yes | | Yes | Yes |
| Melloul  et al 2011 | **PTGBD group** | Yes | Yes | Yes | NR | | Yes | NR |
| **LC in control group** | Yes | Yes | Yes | NR | | Yes | NR |
| **OC in control group** | Yes | Yes | Yes | NR | | Yes | NR |
