# Supplementary figures and images for: Management of Acute Cholecystitis in High-Risk Patients: Percutaneous Gallbladder Drainage as a Definitive Treatment vs. Emergency Cholecystectomy. Systematic Review and Meta-Analysis
Source: Preprints.org preprint supplement (doi:10.20944/preprints202307.0094.v1), 2023-07-04

Supplementary Fig. 3. Risk-of-bias domains

**
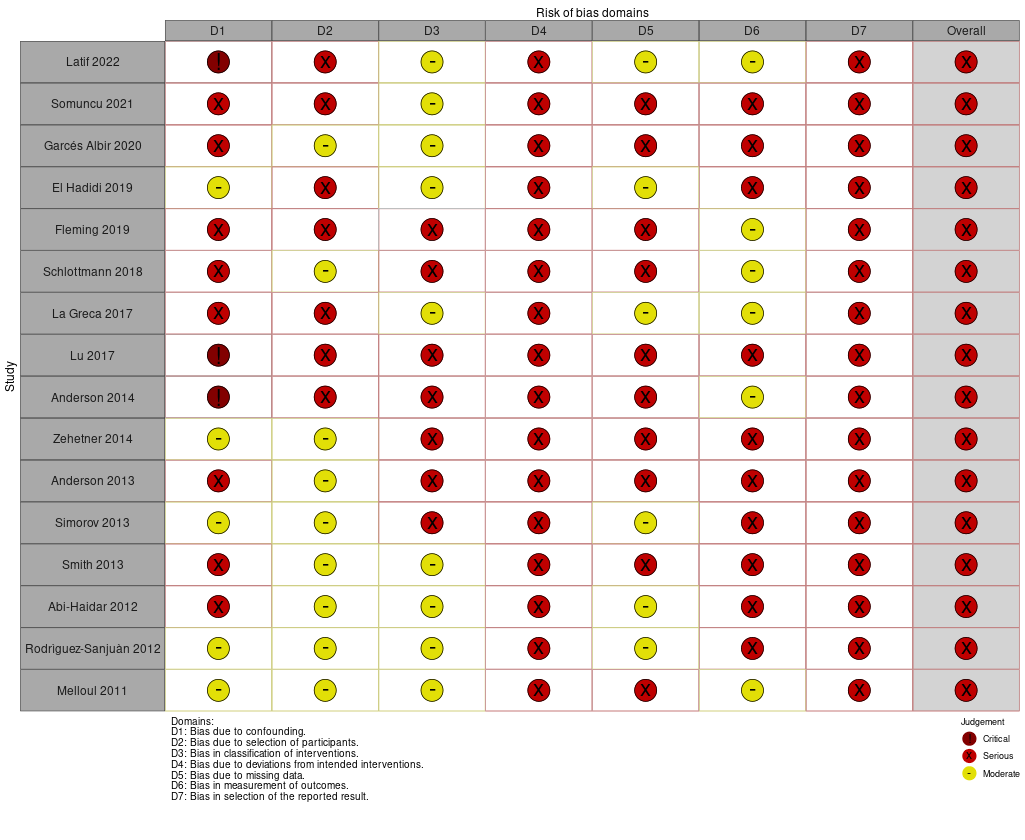
**

Supplement: Supplementary file 1 [file supplementary]

Supplementary Fig. 4. Forest plot of abdominal abscess in PTGBD vs EC


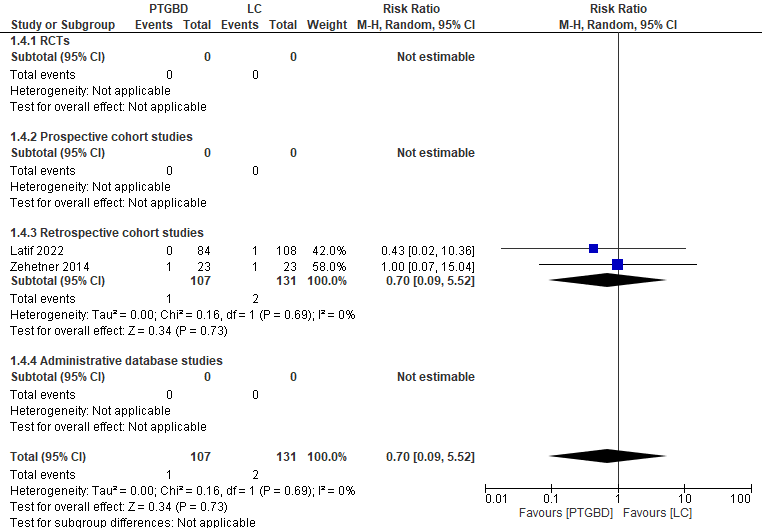

Supplement: Supplementary file 7 [file SDC Fig 4.docx]

Supplementary Fig. 5. Forest plot of major postoperative complications between PTGBD vs EC


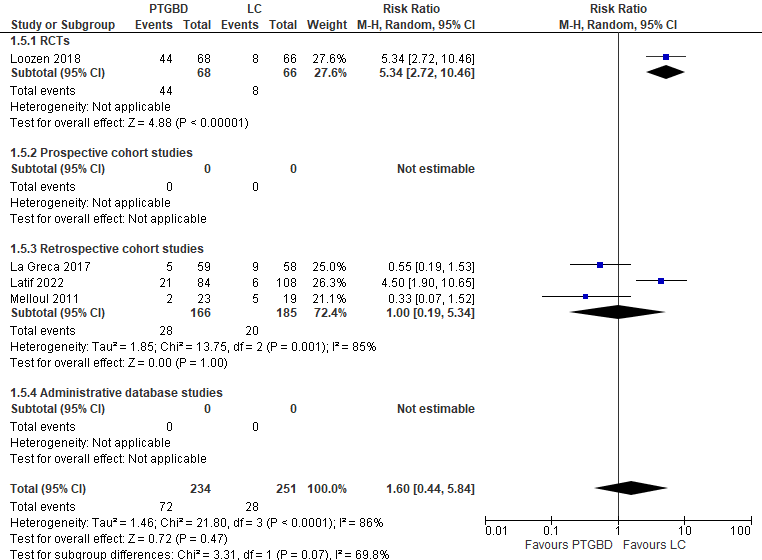

Supplement: Supplementary file 8 [file SDC Fig 5.docx]

Supplementary Fig. 6. Forest plot of length of hospital stay between PTGBD vs EC


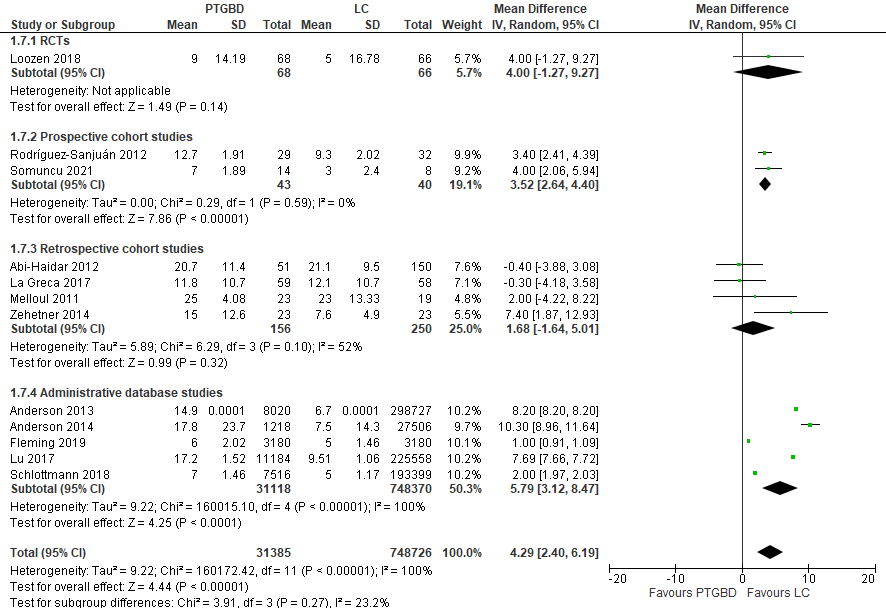

Supplement: Supplementary file 9 [file SDC Fig 6.docx]
